# Supplementary material for: Antibody levels following vaccination against SARS-CoV-2: associations with post-vaccination infection and risk factors in two UK longitudinal studies
Source: eLife. 2023 Jan 24;12:e80428. doi: 10.7554/eLife.80428 (PMC9940912; doi:10.7554/eLife.80428)
Supplement: Supplementary file 1. [file elife-80428-supp1.xlsx]

## Sheet: Variable information-Combined
Supplementary file 1. Information on origin of variables used in TwinsUK and ALSPAC analyses.
			TwinsUK				ALSPAC
Variable group	Variable	Reference category (categorical variables) or unit (continuous variables) in logistic regression models	Details/Notes	Data source	Collection date	References	Details/Notes	Data source	Collection date	References
COVID-19 at-risk	Advised on "Shielded Patient List"	No	Were you contacted by letter or text message to say you are at severe risk from COVID-19 due to an underlying health condition and should be shielding? Yes No	COVID-19 questionnaire	Collected in multiple COVID-19 questionnaires between April 2020 and January 2022. Most affirmative positive answer (yes over no) response taken	Shielded Patient List - NHS Digital. https://digital.nhs.uk/coronavirus/shielded-patient-list (accessed 29 Nov 2021). COVID-19 – high risk shielded patient list identification methodology - NHS Digital. https://digital.nhs.uk/coronavirus/shielded-patient-list/methodology (accessed 7 Feb 2022).	Were you contacted by letter or text message to say you are at severe risk from COVID-19 due to an underlying health condition and should be shielding? Yes No	COVID-19 questionnaire 5	Questionnaire 5 was collected between 21st July 2021 and 11th December 2021.
COVID-19 at-risk	Frailty (PRISMA-7 assessment): Above threshold	The PRISMA-7 score is the number of "yes" answers to the five questions to the right plus "Are you male?" and "Are you older than 85 years?" (the answers to which were derived from the age and sex variables). A score of 3 or more indicates an increased risk of frailty and hence the reference value is a score of 0-2.					For each of the following questions please consider your usual situation and respond Yes or No (PRISMA- 7 Q) Yes No a. In general, do you have health problems that require you to limit your activities? b. Do you need someone to help you on a regular basis? c. In general, do you have any health problems that require you to stay at home? d. If you need help, can you count on someone close to you? e…	COVID-19 questionnaire 1	Questionnaire 1 was collected between 9th April and 15th May 2020	Raîche, M., R. Hébert, M-F. Dubois, and the PRISMA partners. User guide for the PRISMA-7 questionnaire to identify elderly people with severe loss of autonomy. In Integrated service delivery to ensure persons' functional autonomy, ed. R. Hébert, A. Tourigny, and M. Gagnon, 147-65. Quebec: Edisem
COVID-19 at-risk	Frailty Index	Healthy	Frailty within TwinsUK was assessed using a Frailty Index (FI) derived from self-reported comorbidities data as previously outlined, and grouped according to level of frailty: Healthy (FI < 0.12), Pre-frail (0.12 ≤ FI < 0.3), Frail (0.3 ≤ FI < 0.44), Very Frail (FI ≥ 0.44).	Derived from self-reported ongoing conditions from TwinsUK baseline questionnaires		Searle SD, Mitnitski A, Gahbauer EA, et al. A standard procedure for creating a frailty index. BMC Geriatr 2008;8:1–10. doi:10.1186/1471-2318-8-24
COVID-19 at-risk	Prescribed immunosuppressant medication	No	Immunosuppressant medications were identifed from the full list of self-reported prescribed medications by a clinician. List of immunosuppressant medications is given on separate tab, S1a.	Derived from self-reported medication prescription data from TwinsUK baseline questionnaires	Data from between 2017 onwards considered
COVID-19 at-risk	Self-reported immunosuppressed	No					Are you or do you currently have any of the following: A weakened immune system/reduced ability to deal with infections (as a result of a disease or treatment) Yes/No	COVID-19 questionnaire 1	Questionnaire 1 was collected between 9th April and 15th May 2020
COVID-19 infection	Anti-Nucleocapsid antibody status: Positive	Negative	Refers to Anti-Nucleocapsid result at time of Q2 and Q4 antibody testing	Antibody testing data	Q2 and Q4 antibody testing in Apr-May 2021 and Nov 2021-Jan 2022		Refers to Anti-Nucleocapsid result at time of Q2 antibody testing	Antibody testing data	Collection between 8th April and 28th June 2021	Major-Smith D, Matthews S, Breeze T et al. The Avon Longitudinal Study of Parents and Children - A resource for COVID-19 research: Antibody testing results, April – June 2021 [version 2; peer review: 2 approved]. Wellcome Open Res 2022, 6:283 (https://doi.org/10.12688/wellcomeopenres.17294.2)
COVID-19 infection	SARS-CoV-2 infection status (self-reported)	No covid	Derived from combination of self-reported status question, "Do you think that you currently have or have ever had COVID-19?", in addition to self-reported positive antibody and antigen tests collected within COVID-19 questionnaires	COVID-19 questionnaire	Collected in multiple COVID-19 questionnaires between April 2020 and January 2022. Most affirmative positive answer response taken, based on the following hierarchy: self-reported positive test > suspected case > unsure > no infection		Do you think that you have or have had COVID-19? Yes, confirmed by a positive test Yes, suspected by a doctor but not tested Yes, my own suspicions No	COVID-19 questionnaires 1-4	Collected in four COVID-19 questionnaires between April 2020 and March 2021. Most affirmative positive answer response taken, based on the following hierarchy: self-reported positive test > suspected case > no infection
COVID-19 infection	SARS-CoV-2 infection status (serology-based): Evidence of natural infection	No evidence of natural infection	Ascertained using a combination of Q2 and Q4 antibody tests and ELISA antibody test results performed in the TwinsUK laboratory between April 2020 and May 2021. This SARS-CoV-2 infection status classification is based on guidance from the Centers for Disease Control and Prevention. The status of individuals with positive Anti-Spike and negative Anti-Nucleocapsid results when vaccination status is…	Derived from combination of vaccination status (derived from COVID-19 questionnaires) and antibody testing data	Vaccination status collected in COVID-19 questionnaires in Apr-May 2021 and Nov 2021-Jan 2022. Antibody test data from between April 2020 and January 2022.	Centers for Disease Control and Prevention. Interim Guidelines for COVID-19 Antibody Testing | CDC. 2021.https://www.cdc.gov/coronavirus/2019-ncov/lab/resources/antibody-tests-guidelines.html (accessed 6 Jul 2021).	This SARS-CoV-2 infection status classification is based on guidance from the Centers for Disease Control and Prevention. Analysis was only performed on those with a known vaccination date. Evidence of natural infection: Positive Anti-Nucleocapsid at any time prior to sampling for Roche assay, regardless of vaccination status OR Positive Anti-Spike prior to first SARS-CoV-2 vaccination only. No e…	Derived from combination of vaccination status (derived from COVID-19 questionnaire 5) and antibody testing data	Vaccination dates collected in COVID-19 questionnaire5 between 21st July 2021 and 11th December 2021. Antibody test data from 8th April and 28th June 2021.	Centers for Disease Control and Prevention. Interim Guidelines for COVID-19 Antibody Testing | CDC. 2021.https://www.cdc.gov/coronavirus/2019-ncov/lab/resources/antibody-tests-guidelines.html (accessed 6 Jul 2021).
COVID-19 infection	COVID-19 symptom/infection start date (self-reported)	N/A - not used in logistic regression model	Used as part of identification of post-vaccination infection. In COVID-19 questionnaire, after being asked "Do you think that you currently have or have ever had COVID-19?", those who answered yes or unsure were then asked to provide date of infection/symptom start, "When do you think you first caught or showed symptoms of (or might have got) COVID-19? "	COVID-19 questionnaire	Collected in multiple COVID-19 questionnaires between April 2020 and January 2022
COVID-19 vaccination	Vaccine received	Pfizer BioNTech	What is the name of the first/second/booster vaccine injection you received? o Oxford AstraZeneca o Pfizer BioNTech o mRNA-1273 o Janssen / Johnson & Johnson o Valneva o Novavax o Other – please specify________ o Don’t know o Prefer not to say For first and second vaccination, categories other than Oxford AstraZeneca and PfizerBioNTech are grouped as 'Other'. For third vaccination, categories oth…	COVID-19 questionnaire	Collected in COVID-19 questionnaires in Apr-May 2021 and Nov 2021-Jan 2022.		What is the name of the first/second vaccine injection you received? o Oxford AstraZeneca o Pfizer BioNTech o Moderna o Janssen / Johnson & Johnson o Valneva o Novavax o Other – please specify________ o Don’t know Categories other than Oxford AstraZeneca and PfizerBioNTech were removed from analyses.	COVID-19 questionnaire 5	Questionnaire 5 was collected between 21st July 2021 and 11th December 2021.
COVID-19 vaccination	Weeks since vaccination	Unit: +1 week	Derived from combination of vaccination status (derived from COVID-19 questionnaires) and antibody testing data				Derived from combination of vaccination status (derived from COVID-19 questionnaire 5) and antibody testing data
Comorbidities	# Selected comorbidities	No comorbidities	Multi-morbidity count based on availability across both cohorts, that included: anxiety or stress disorder, depression, diabetes (type 1 or 2), hypertension, cancer (any type), and heart disease (heart failure or coronary heart disease).	Derived from self-reported ongoing conditions from TwinsUK baseline questionnaires	2014-2019		Multi-morbidity count based on availability across both cohorts, that included: anxiety or stress disorder, depression, diabetes (type 1 or 2), hypertension, cancer (any type), and heart disease (heart failure or coronary heart disease).	COVID-19 questionnaire 1	Questionnaire 1 was collected between 9th April and 15th May 2020
Comorbidities	Comorbidity domain: Arthritis (any)	Comorbidity not reported		Self-reported ongoing condition from TwinsUK baseline questionnaires	2014-2019
Comorbidities	Comorbidity domain: Cardiac Disease	Comorbidity not reported		See above	2014-2019
Comorbidities	Comorbidity domain: Cardiac Risk Factors	Comorbidity not reported		See above	2014-2019
Comorbidities	Comorbidity domain: Subjective Memory Impairment	Comorbidity not reported		See above	2014-2019
Comorbidities	Comorbidity: Anxiety or Depression	Comorbidity not reported		See above	2014-2019		Derived from the variables for anxiety and depression	COVID-19 questionnaire 1	Questionnaire 1 was collected between 9th April and 15th May 2020
Comorbidities	Comorbidity: Anxiety or Stress Disorder	Comorbidity not reported		See above	2014-2019		Are you or do you currently have any of the following: (Yes/No) Anxiety	COVID-19 questionnaire 1	Questionnaire 1 was collected between 9th April and 15th May 2020
Comorbidities	Comorbidity: Asthma	Comorbidity not reported		See above	2014-2019		Are you or do you currently have any of the following: (Yes/No) Asthma_x000D_	COVID-19 questionnaire 1	Questionnaire 1 was collected between 9th April and 15th May 2020
Comorbidities	Comorbidity: Atrial Fibrillation	Comorbidity not reported		See above	2014-2019
Comorbidities	Comorbidity: Cancer (any)	Comorbidity not reported		See above	2014-2019		Are you or do you currently have any of the following: (Yes/No) Cancer	COVID-19 questionnaire 1	Questionnaire 1 was collected between 9th April and 15th May 2020
Comorbidities	Comorbidity: Chronic Lung Disease	Comorbidity not reported		See above	2014-2019
Comorbidities	Comorbidity: Depression	Comorbidity not reported		See above	2014-2019		Are you or do you currently have any of the following: (Yes/No) Depression	COVID-19 questionnaire 1	Questionnaire 1 was collected between 9th April and 15th May 2020
Comorbidities	Comorbidity: Diabetes	Comorbidity not reported		See above	2014-2019
Comorbidities	Comorbidity: Diabetes (any)	Comorbidity not reported		See above	2014-2019		Are you or do you currently have any of the following: (Yes/No) Diabetes (Type I or II)	COVID-19 questionnaire 1	Questionnaire 1 was collected between 9th April and 15th May 2020
Comorbidities	Comorbidity: Heart disease (CHD or Heart failure)	Comorbidity not reported		See above	2014-2019		Are you or do you currently have any of the following: (Yes/No) Heart disease or heart problems	COVID-19 questionnaire 1	Questionnaire 1 was collected between 9th April and 15th May 2020
Comorbidities	Comorbidity: High Cholesterol	Comorbidity not reported		See above	2014-2019
Comorbidities	Comorbidity: Hypertension	Comorbidity not reported		See above	2014-2019		Are you or do you currently have any of the following: (Yes/No) Hypertension (high blood pressure)	COVID-19 questionnaire 1	Questionnaire 1 was collected between 9th April and 15th May 2020
Comorbidities	Comorbidity: Lung disease	Comorbidity not reported		See above	2014-2019		Are you or do you currently have any of the following: (Yes/No) Other lung condition such as COPD, bronchitis or emphysema_x000D_	COVID-19 questionnaire 1	Questionnaire 1 was collected between 9th April and 15th May 2020
Comorbidities	Comorbidity: Neurological Disease	Comorbidity not reported		See above	2014-2019		Are you or do you currently have any of the following: (Yes/No) Condition affecting the brain and nerves (e.g. Dementia, Parkinson’s, Multiple Sclerosis)	COVID-19 questionnaire 1	Questionnaire 1 was collected between 9th April and 15th May 2020
Comorbidities	Comorbidity: Osteoporosis	Comorbidity not reported		See above	2014-2019
Comorbidities	Comorbidity: Rheumatoid Arthritis	Comorbidity not reported		See above	2014-2019
Comorbidities	Comorbidity: Stroke	Comorbidity not reported		See above	2014-2019
General health	Body Mass Index (BMI)	Unit: +1 kg/m^2		Internal TwinsUK data			Last known value in wider ALSPAC data	Internal ALSPAC data
General health	Self-rated health	Unit: -1 step on 5-point scale, indicative of decreasing health	In general, in the 3 months before the COVID-19 outbreak in March 2020, would you say your health was... o (5) Excellent o (4) Very good o (3) Good o (2) Fair o (1) Poor	COVID-19 questionnaire	Collected in multiple COVID-19 questionnaires between April 2020 and January 2022. Earliest valid response taken		In general, in the 3 months before the COVID-19 outbreak started in March 2020, would you say your health was... o (5) Excellent o (4) Very good o (3) Good o (2) Fair o (1) Poor	COVID-19 questionnaire 5	Questionnaire 5 was collected between 21st July 2021 and 11th December 2021.
Mental health	Anxiety (GAD-7)	Unit: +1 score					Total GAD-7 Questionnaire score (max = 21), with a greater score indicating more anxiety symptoms	COVID-19 questionnaire 1	Questionnaire 1 was collected between 9th April and 15th May 2020	Spitzer RL, Kroenke K, Williams JBW, Löwe B. A Brief Measure for Assessing Generalized Anxiety Disorder: The GAD-7. Arch Intern Med. 2006;166(10):1092–1097
Mental health	Anxiety (HADS)	Unit: +1 score	Hospital Anxiety and Depression Scale, anxiety screening assessment. Range 0-21	COVID-19 questionnaire	Collected in multiple COVID-19 questionnaires between April 2020 and January 2022. Maximum single score taken
Mental health	Depression (HADS)	Unit: +1 score	Hospital Anxiety and Depression Scale, depression screening assessment. Range 0-21	COVID-19 questionnaire	Collected in multiple COVID-19 questionnaires between April 2020 and January 2022. Maximum single score taken
Mental health	Depression (SMFQ)	Unit: +1 score					The total Short Mood and Feelings Questionnaire score (max = 26), with a greater score indicating more depressive symptoms	COVID-19 questionnaire 1	Questionnaire 1 was collected between 9th April and 15th May 2020	Angold A, Costello EJ, Messer SC, et al.: Development of a short questionnaire for use in epidemiological studies of depression in children and adolescents. Int J Methods Psychiatr Res. 1995; 5(4): 237–249
Socio-demographics	Age	Unit: +1 year		Internal TwinsUK data				Internal ALSPAC data
Socio-demographics	Deprivation (IMD)	Unit: -1 decile, increasing deprivation	Index of Multiple deprivation. Rank of local area deprivation is grouped to generate IMD decile and quintiles.	Derived from lower super output areas of registered addresses	The latest available IMD data was downloaded from the following sources: England, 2019, Wales, 2019, Scotland, 2020, Northern Ireland, 2017	English indices of deprivation 2019 - GOV.UK. https://www.gov.uk/government/statistics/english-indices-of-deprivation-2019 (accessed 29 Nov 2021). Welsh Index of Multiple Deprivation (full Index update with ranks): 2019 | GOV.WALES. https://gov.wales/welsh-index-multiple-deprivation-full-index-update-ranks-2019 (accessed 29 Nov 2021). Scottish Index of Multiple Deprivation 2020 - gov.scot. https:…	Index of Multiple Deprivation	Internal ALSPAC data collected for Mothers only in 2014
Socio-demographics	Employment status	Employed	Which one of these best describes what you were doing just before the COVID-19 outbreak? If you were doing more than one activity, please choose the activity you spent the most time doing? Select one only o Employed (1) o Self-employed (2) o In unpaid/ voluntary work (3) o Apprenticeship (4) o Unemployed (5) o Permanently sick or disabled (6) o Looking after home or family (7) o In education at s…	COVID-19 questionnaire	Collected in multiple COVID-19 questionnaires between April 2020 and January 2022. Earliest valid response taken		Which of these would you say best describes your current situation now? Employed and working the same number of hours (as you were pre-lockdown in March 2020) Employed and working a reduced number of hours compared to March 2020 Employed and working more hours than compared to March 2020 Employed but on paid leave (including furlough) Employed and on unpaid leave Apprenticeship In unpaid/voluntar…	COVID-19 questionnaire 4	Questionnaire 4 was collected between 17th November 2020 and 19th March 2021
Socio-demographics	Ethnicity	White	Due to few ethnicities other than White within TwinsUK , ethnicity was grouped into “White” and “Other than white”.	Internal TwinsUK data			Due to few ethnicities other than White within ALSPAC , ethnicity was grouped into “White” and “Other than white”.	Internal ALSPAC data
Socio-demographics	Highest educational attainment	NVQ level 4 or higher	What is the highest academic/educational qualification (or its nearest equivalent), that you have received? Select one only o No qualification (1) o NVQ1/SVQ1 (2) o O-level/GCSE/NVQ2/SVQ2/Scottish intermediate (3) o Scottish Higher, NVQ3, City and Guilds, Pitman (4) o A-level, Scottish Advanced Higher (5) o Higher vocational training (e.g. Diploma, NVQ4, SVQ4) (6) o Undergraduate degree (7) o Pos…	COVID-19 questionnaire	Collected in COVID-19 questionnaires in April 2020		What educational qualifications do you have? Please tick all that apply: a) CSE or GCSE (D, E, F or G) b) O-level or GCSE (A, B or C) c) A-level d) Qualifications in shorthand/typing/or other skills, e g hairdressing e) Apprenticeship f) State enrolled nurse g) State registered nurse h) City & Guilds intermediate technical i) City & Guilds final technical j) City & Guilds full technical k) Teachi…	Internal ALSPAC data, collected during pregnancy 1990-1992
Socio-demographics	Rural-urban classification (RUC)	Rural	Rural-urban classification. Grouped into: Rural Urban	Derived from lower super output areas of registered addresses		Rural Urban Classification - GOV.UK. https://www.gov.uk/government/collections/rural-urban-classification (accessed 15 Mar 2022).
Socio-demographics	Sex	Female		Internal TwinsUK data				Internal ALSPAC data

## Sheet: Variable information-TUK
Supplementary file 1. Information on origin of variables used in TwinsUK and ALSPAC analyses.
			TwinsUK
Variable group	Variable	Reference category (categorical variables) or unit (continuous variables) in logistic regression models	Details/Notes	Data source	Collection date	References
COVID-19 at-risk	Advised on "Shielded Patient List"	No	Were you contacted by letter or text message to say you are at severe risk from COVID-19 due to an underlying health condition and should be shielding? Yes No	COVID-19 questionnaire	Collected in multiple COVID-19 questionnaires between April 2020 and January 2022. Most affirmative positive answer (yes over no) response taken	Shielded Patient List - NHS Digital. https://digital.nhs.uk/coronavirus/shielded-patient-list (accessed 29 Nov 2021). COVID-19 – high risk shielded patient list identification methodology - NHS Digital. https://digital.nhs.uk/coronavirus/shielded-patient-list/methodology (accessed 7 Feb 2022).
COVID-19 at-risk	Frailty (PRISMA-7 assessment): Above threshold	The PRISMA-7 score is the number of "yes" answers to the five questions to the right plus "Are you male?" and "Are you older than 85 years?" (the answers to which were derived from the age and sex variables). A score of 3 or more indicates an increased risk of frailty and hence the reference value is a score of 0-2.
COVID-19 at-risk	Frailty Index	Healthy	Frailty within TwinsUK was assessed using a Frailty Index (FI) derived from self-reported comorbidities data as previously outlined, and grouped according to level of frailty: Healthy (FI < 0.12), Pre-frail (0.12 ≤ FI < 0.3), Frail (0.3 ≤ FI < 0.44), Very Frail (FI ≥ 0.44).	Derived from self-reported ongoing conditions from TwinsUK baseline questionnaires		Searle SD, Mitnitski A, Gahbauer EA, et al. A standard procedure for creating a frailty index. BMC Geriatr 2008;8:1–10. doi:10.1186/1471-2318-8-24
COVID-19 at-risk	Prescribed immunosuppressant medication	No	Immunosuppressant medications were identifed from the full list of self-reported prescribed medications by a clinician. List of immunosuppressant medications is given on separate tab, S1a.	Derived from self-reported medication prescription data from TwinsUK baseline questionnaires	Data from between 2017 onwards considered
COVID-19 at-risk	Self-reported immunosuppressed	No
COVID-19 infection	Anti-Nucleocapsid antibody status: Positive	Negative	Refers to Anti-Nucleocapsid result at time of Q2 and Q4 antibody testing	Antibody testing data	Q2 and Q4 antibody testing in Apr-May 2021 and Nov 2021-Jan 2022
COVID-19 infection	SARS-CoV-2 infection status (self-reported)	No covid	Derived from combination of self-reported status question, "Do you think that you currently have or have ever had COVID-19?", in addition to self-reported positive antibody and antigen tests collected within COVID-19 questionnaires	COVID-19 questionnaire	Collected in multiple COVID-19 questionnaires between April 2020 and January 2022. Most affirmative positive answer response taken, based on the following hierarchy: self-reported positive test > suspected case > unsure > no infection
COVID-19 infection	SARS-CoV-2 infection status (serology-based): Evidence of natural infection	No evidence of natural infection	Ascertained using a combination of Q2 and Q4 antibody tests and ELISA antibody test results performed in the TwinsUK laboratory between April 2020 and May 2021. This SARS-CoV-2 infection status classification is based on guidance from the Centers for Disease Control and Prevention. The status of individuals with positive Anti-Spike and negative Anti-Nucleocapsid results when vaccination status is…	Derived from combination of vaccination status (derived from COVID-19 questionnaires) and antibody testing data	Vaccination status collected in COVID-19 questionnaires in Apr-May 2021 and Nov 2021-Jan 2022. Antibody test data from between April 2020 and January 2022.	Centers for Disease Control and Prevention. Interim Guidelines for COVID-19 Antibody Testing | CDC. 2021.https://www.cdc.gov/coronavirus/2019-ncov/lab/resources/antibody-tests-guidelines.html (accessed 6 Jul 2021).
COVID-19 infection	COVID-19 symptom/infection start date (self-reported)	N/A - not used in logistic regression model	Used as part of identification of post-vaccination infection. In COVID-19 questionnaire, after being asked "Do you think that you currently have or have ever had COVID-19?", those who answered yes or unsure were then asked to provide date of infection/symptom start, "When do you think you first caught or showed symptoms of (or might have got) COVID-19? "	COVID-19 questionnaire	Collected in multiple COVID-19 questionnaires between April 2020 and January 2022
COVID-19 vaccination	Vaccine received	Pfizer BioNTech	What is the name of the first/second/booster vaccine injection you received? o Oxford AstraZeneca o Pfizer BioNTech o mRNA-1273 o Janssen / Johnson & Johnson o Valneva o Novavax o Other – please specify________ o Don’t know o Prefer not to say For first and second vaccination, categories other than Oxford AstraZeneca and PfizerBioNTech are grouped as 'Other'. For third vaccination, categories oth…	COVID-19 questionnaire	Collected in COVID-19 questionnaires in Apr-May 2021 and Nov 2021-Jan 2022.
COVID-19 vaccination	Weeks since vaccination	Unit: +1 week	Derived from combination of vaccination status (derived from COVID-19 questionnaires) and antibody testing data
Comorbidities	# Selected comorbidities	No comorbidities	Multi-morbidity count based on availability across both cohorts, that included: anxiety or stress disorder, depression, diabetes (type 1 or 2), hypertension, cancer (any type), and heart disease (heart failure or coronary heart disease).	Derived from self-reported ongoing conditions from TwinsUK baseline questionnaires	2014-2019
Comorbidities	Comorbidity domain: Arthritis (any)	Comorbidity not reported		Self-reported ongoing condition from TwinsUK baseline questionnaires	2014-2019
Comorbidities	Comorbidity domain: Cardiac Disease	Comorbidity not reported		See above	2014-2019
Comorbidities	Comorbidity domain: Cardiac Risk Factors	Comorbidity not reported		See above	2014-2019
Comorbidities	Comorbidity domain: Subjective Memory Impairment	Comorbidity not reported		See above	2014-2019
Comorbidities	Comorbidity: Anxiety or Depression	Comorbidity not reported		See above	2014-2019
Comorbidities	Comorbidity: Anxiety or Stress Disorder	Comorbidity not reported		See above	2014-2019
Comorbidities	Comorbidity: Asthma	Comorbidity not reported		See above	2014-2019
Comorbidities	Comorbidity: Atrial Fibrillation	Comorbidity not reported		See above	2014-2019
Comorbidities	Comorbidity: Cancer (any)	Comorbidity not reported		See above	2014-2019
Comorbidities	Comorbidity: Chronic Lung Disease	Comorbidity not reported		See above	2014-2019
Comorbidities	Comorbidity: Depression	Comorbidity not reported		See above	2014-2019
Comorbidities	Comorbidity: Diabetes	Comorbidity not reported		See above	2014-2019
Comorbidities	Comorbidity: Diabetes (any)	Comorbidity not reported		See above	2014-2019
Comorbidities	Comorbidity: Heart disease (CHD or Heart failure)	Comorbidity not reported		See above	2014-2019
Comorbidities	Comorbidity: High Cholesterol	Comorbidity not reported		See above	2014-2019
Comorbidities	Comorbidity: Hypertension	Comorbidity not reported		See above	2014-2019
Comorbidities	Comorbidity: Lung disease	Comorbidity not reported		See above	2014-2019
Comorbidities	Comorbidity: Neurological Disease	Comorbidity not reported		See above	2014-2019
Comorbidities	Comorbidity: Osteoporosis	Comorbidity not reported		See above	2014-2019
Comorbidities	Comorbidity: Rheumatoid Arthritis	Comorbidity not reported		See above	2014-2019
Comorbidities	Comorbidity: Stroke	Comorbidity not reported		See above	2014-2019
General health	Body Mass Index (BMI)	Unit: +1 kg/m^2		Internal TwinsUK data
General health	Self-rated health	Unit: -1 step on 5-point scale, indicative of decreasing health	In general, in the 3 months before the COVID-19 outbreak in March 2020, would you say your health was... o (5) Excellent o (4) Very good o (3) Good o (2) Fair o (1) Poor	COVID-19 questionnaire	Collected in multiple COVID-19 questionnaires between April 2020 and January 2022. Earliest valid response taken
Mental health	Anxiety (GAD-7)	Unit: +1 score
Mental health	Anxiety (HADS)	Unit: +1 score	Hospital Anxiety and Depression Scale, anxiety screening assessment. Range 0-21	COVID-19 questionnaire	Collected in multiple COVID-19 questionnaires between April 2020 and January 2022. Maximum single score taken
Mental health	Depression (HADS)	Unit: +1 score	Hospital Anxiety and Depression Scale, depression screening assessment. Range 0-21	COVID-19 questionnaire	Collected in multiple COVID-19 questionnaires between April 2020 and January 2022. Maximum single score taken
Mental health	Depression (SMFQ)	Unit: +1 score
Socio-demographics	Age	Unit: +1 year		Internal TwinsUK data
Socio-demographics	Deprivation (IMD)	Unit: -1 decile, increasing deprivation	Index of Multiple deprivation. Rank of local area deprivation is grouped to generate IMD decile and quintiles.	Derived from lower super output areas of registered addresses	The latest available IMD data was downloaded from the following sources: England, 2019, Wales, 2019, Scotland, 2020, Northern Ireland, 2017	English indices of deprivation 2019 - GOV.UK. https://www.gov.uk/government/statistics/english-indices-of-deprivation-2019 (accessed 29 Nov 2021). Welsh Index of Multiple Deprivation (full Index update with ranks): 2019 | GOV.WALES. https://gov.wales/welsh-index-multiple-deprivation-full-index-update-ranks-2019 (accessed 29 Nov 2021). Scottish Index of Multiple Deprivation 2020 - gov.scot. https:…
Socio-demographics	Employment status	Employed	Which one of these best describes what you were doing just before the COVID-19 outbreak? If you were doing more than one activity, please choose the activity you spent the most time doing? Select one only o Employed (1) o Self-employed (2) o In unpaid/ voluntary work (3) o Apprenticeship (4) o Unemployed (5) o Permanently sick or disabled (6) o Looking after home or family (7) o In education at s…	COVID-19 questionnaire	Collected in multiple COVID-19 questionnaires between April 2020 and January 2022. Earliest valid response taken
Socio-demographics	Ethnicity	White	Due to few ethnicities other than White within TwinsUK , ethnicity was grouped into “White” and “Other than white”.	Internal TwinsUK data
Socio-demographics	Highest educational attainment	NVQ level 4 or higher	What is the highest academic/educational qualification (or its nearest equivalent), that you have received? Select one only o No qualification (1) o NVQ1/SVQ1 (2) o O-level/GCSE/NVQ2/SVQ2/Scottish intermediate (3) o Scottish Higher, NVQ3, City and Guilds, Pitman (4) o A-level, Scottish Advanced Higher (5) o Higher vocational training (e.g. Diploma, NVQ4, SVQ4) (6) o Undergraduate degree (7) o Pos…	COVID-19 questionnaire	Collected in COVID-19 questionnaires in April 2020
Socio-demographics	Rural-urban classification (RUC)	Rural	Rural-urban classification. Grouped into: Rural Urban	Derived from lower super output areas of registered addresses		Rural Urban Classification - GOV.UK. https://www.gov.uk/government/collections/rural-urban-classification (accessed 15 Mar 2022).
Socio-demographics	Sex	Female		Internal TwinsUK data

## Sheet: Variable information-ALSPAC
Supplementary file 1. Information on origin of variables used in TwinsUK and ALSPAC analyses.
			ALSPAC
Variable group	Variable	Reference category (categorical variables) or unit (continuous variables) in logistic regression models	Details/Notes	Data source	Collection date	References
COVID-19 at-risk	Advised on "Shielded Patient List"	No	Were you contacted by letter or text message to say you are at severe risk from COVID-19 due to an underlying health condition and should be shielding? Yes No	COVID-19 questionnaire 5	Questionnaire 5 was collected between 21st July 2021 and 11th December 2021.
COVID-19 at-risk	Frailty (PRISMA-7 assessment): Above threshold	The PRISMA-7 score is the number of "yes" answers to the five questions to the right plus "Are you male?" and "Are you older than 85 years?" (the answers to which were derived from the age and sex variables). A score of 3 or more indicates an increased risk of frailty and hence the reference value is a score of 0-2.	For each of the following questions please consider your usual situation and respond Yes or No (PRISMA- 7 Q) Yes No a. In general, do you have health problems that require you to limit your activities? b. Do you need someone to help you on a regular basis? c. In general, do you have any health problems that require you to stay at home? d. If you need help, can you count on someone close to you? e…	COVID-19 questionnaire 1	Questionnaire 1 was collected between 9th April and 15th May 2020	Raîche, M., R. Hébert, M-F. Dubois, and the PRISMA partners. User guide for the PRISMA-7 questionnaire to identify elderly people with severe loss of autonomy. In Integrated service delivery to ensure persons' functional autonomy, ed. R. Hébert, A. Tourigny, and M. Gagnon, 147-65. Quebec: Edisem
COVID-19 at-risk	Frailty Index	Healthy
COVID-19 at-risk	Prescribed immunosuppressant medication	No
COVID-19 at-risk	Self-reported immunosuppressed	No	Are you or do you currently have any of the following: A weakened immune system/reduced ability to deal with infections (as a result of a disease or treatment) Yes/No	COVID-19 questionnaire 1	Questionnaire 1 was collected between 9th April and 15th May 2020
COVID-19 infection	Anti-Nucleocapsid antibody status: Positive	Negative	Refers to Anti-Nucleocapsid result at time of Q2 antibody testing	Antibody testing data	Collection between 8th April and 28th June 2021	Major-Smith D, Matthews S, Breeze T et al. The Avon Longitudinal Study of Parents and Children - A resource for COVID-19 research: Antibody testing results, April – June 2021 [version 2; peer review: 2 approved]. Wellcome Open Res 2022, 6:283 (https://doi.org/10.12688/wellcomeopenres.17294.2)
COVID-19 infection	SARS-CoV-2 infection status (self-reported)	No covid	Do you think that you have or have had COVID-19? Yes, confirmed by a positive test Yes, suspected by a doctor but not tested Yes, my own suspicions No	COVID-19 questionnaires 1-4	Collected in four COVID-19 questionnaires between April 2020 and March 2021. Most affirmative positive answer response taken, based on the following hierarchy: self-reported positive test > suspected case > no infection
COVID-19 infection	SARS-CoV-2 infection status (serology-based): Evidence of natural infection	No evidence of natural infection	This SARS-CoV-2 infection status classification is based on guidance from the Centers for Disease Control and Prevention. Analysis was only performed on those with a known vaccination date. Evidence of natural infection: Positive Anti-Nucleocapsid at any time prior to sampling for Roche assay, regardless of vaccination status OR Positive Anti-Spike prior to first SARS-CoV-2 vaccination only. No e…	Derived from combination of vaccination status (derived from COVID-19 questionnaire 5) and antibody testing data	Vaccination dates collected in COVID-19 questionnaire5 between 21st July 2021 and 11th December 2021. Antibody test data from 8th April and 28th June 2021.	Centers for Disease Control and Prevention. Interim Guidelines for COVID-19 Antibody Testing | CDC. 2021.https://www.cdc.gov/coronavirus/2019-ncov/lab/resources/antibody-tests-guidelines.html (accessed 6 Jul 2021).
COVID-19 infection	COVID-19 symptom/infection start date (self-reported)	N/A - not used in logistic regression model
COVID-19 vaccination	Vaccine received	Pfizer BioNTech	What is the name of the first/second vaccine injection you received? o Oxford AstraZeneca o Pfizer BioNTech o Moderna o Janssen / Johnson & Johnson o Valneva o Novavax o Other – please specify________ o Don’t know Categories other than Oxford AstraZeneca and PfizerBioNTech were removed from analyses.	COVID-19 questionnaire 5	Questionnaire 5 was collected between 21st July 2021 and 11th December 2021.
COVID-19 vaccination	Weeks since vaccination	Unit: +1 week	Derived from combination of vaccination status (derived from COVID-19 questionnaire 5) and antibody testing data
Comorbidities	# Selected comorbidities	No comorbidities	Multi-morbidity count based on availability across both cohorts, that included: anxiety or stress disorder, depression, diabetes (type 1 or 2), hypertension, cancer (any type), and heart disease (heart failure or coronary heart disease).	COVID-19 questionnaire 1	Questionnaire 1 was collected between 9th April and 15th May 2020
Comorbidities	Comorbidity domain: Arthritis (any)	Comorbidity not reported
Comorbidities	Comorbidity domain: Cardiac Disease	Comorbidity not reported
Comorbidities	Comorbidity domain: Cardiac Risk Factors	Comorbidity not reported
Comorbidities	Comorbidity domain: Subjective Memory Impairment	Comorbidity not reported
Comorbidities	Comorbidity: Anxiety or Depression	Comorbidity not reported	Derived from the variables for anxiety and depression	COVID-19 questionnaire 1	Questionnaire 1 was collected between 9th April and 15th May 2020
Comorbidities	Comorbidity: Anxiety or Stress Disorder	Comorbidity not reported	Are you or do you currently have any of the following: (Yes/No) Anxiety	COVID-19 questionnaire 1	Questionnaire 1 was collected between 9th April and 15th May 2020
Comorbidities	Comorbidity: Asthma	Comorbidity not reported	Are you or do you currently have any of the following: (Yes/No) Asthma_x000D_	COVID-19 questionnaire 1	Questionnaire 1 was collected between 9th April and 15th May 2020
Comorbidities	Comorbidity: Atrial Fibrillation	Comorbidity not reported
Comorbidities	Comorbidity: Cancer (any)	Comorbidity not reported	Are you or do you currently have any of the following: (Yes/No) Cancer	COVID-19 questionnaire 1	Questionnaire 1 was collected between 9th April and 15th May 2020
Comorbidities	Comorbidity: Chronic Lung Disease	Comorbidity not reported
Comorbidities	Comorbidity: Depression	Comorbidity not reported	Are you or do you currently have any of the following: (Yes/No) Depression	COVID-19 questionnaire 1	Questionnaire 1 was collected between 9th April and 15th May 2020
Comorbidities	Comorbidity: Diabetes	Comorbidity not reported
Comorbidities	Comorbidity: Diabetes (any)	Comorbidity not reported	Are you or do you currently have any of the following: (Yes/No) Diabetes (Type I or II)	COVID-19 questionnaire 1	Questionnaire 1 was collected between 9th April and 15th May 2020
Comorbidities	Comorbidity: Heart disease (CHD or Heart failure)	Comorbidity not reported	Are you or do you currently have any of the following: (Yes/No) Heart disease or heart problems	COVID-19 questionnaire 1	Questionnaire 1 was collected between 9th April and 15th May 2020
Comorbidities	Comorbidity: High Cholesterol	Comorbidity not reported
Comorbidities	Comorbidity: Hypertension	Comorbidity not reported	Are you or do you currently have any of the following: (Yes/No) Hypertension (high blood pressure)	COVID-19 questionnaire 1	Questionnaire 1 was collected between 9th April and 15th May 2020
Comorbidities	Comorbidity: Lung disease	Comorbidity not reported	Are you or do you currently have any of the following: (Yes/No) Other lung condition such as COPD, bronchitis or emphysema_x000D_	COVID-19 questionnaire 1	Questionnaire 1 was collected between 9th April and 15th May 2020
Comorbidities	Comorbidity: Neurological Disease	Comorbidity not reported	Are you or do you currently have any of the following: (Yes/No) Condition affecting the brain and nerves (e.g. Dementia, Parkinson’s, Multiple Sclerosis)	COVID-19 questionnaire 1	Questionnaire 1 was collected between 9th April and 15th May 2020
Comorbidities	Comorbidity: Osteoporosis	Comorbidity not reported
Comorbidities	Comorbidity: Rheumatoid Arthritis	Comorbidity not reported
Comorbidities	Comorbidity: Stroke	Comorbidity not reported
General health	Body Mass Index (BMI)	Unit: +1 kg/m^2	Last known value in wider ALSPAC data	Internal ALSPAC data
General health	Self-rated health	Unit: -1 step on 5-point scale, indicative of decreasing health	In general, in the 3 months before the COVID-19 outbreak started in March 2020, would you say your health was... o (5) Excellent o (4) Very good o (3) Good o (2) Fair o (1) Poor	COVID-19 questionnaire 5	Questionnaire 5 was collected between 21st July 2021 and 11th December 2021.
Mental health	Anxiety (GAD-7)	Unit: +1 score	Total GAD-7 Questionnaire score (max = 21), with a greater score indicating more anxiety symptoms	COVID-19 questionnaire 1	Questionnaire 1 was collected between 9th April and 15th May 2020	Spitzer RL, Kroenke K, Williams JBW, Löwe B. A Brief Measure for Assessing Generalized Anxiety Disorder: The GAD-7. Arch Intern Med. 2006;166(10):1092–1097
Mental health	Anxiety (HADS)	Unit: +1 score
Mental health	Depression (HADS)	Unit: +1 score
Mental health	Depression (SMFQ)	Unit: +1 score	The total Short Mood and Feelings Questionnaire score (max = 26), with a greater score indicating more depressive symptoms	COVID-19 questionnaire 1	Questionnaire 1 was collected between 9th April and 15th May 2020	Angold A, Costello EJ, Messer SC, et al.: Development of a short questionnaire for use in epidemiological studies of depression in children and adolescents. Int J Methods Psychiatr Res. 1995; 5(4): 237–249
Socio-demographics	Age	Unit: +1 year		Internal ALSPAC data
Socio-demographics	Deprivation (IMD)	Unit: -1 decile, increasing deprivation	Index of Multiple Deprivation	Internal ALSPAC data collected for Mothers only in 2014
Socio-demographics	Employment status	Employed	Which of these would you say best describes your current situation now? Employed and working the same number of hours (as you were pre-lockdown in March 2020) Employed and working a reduced number of hours compared to March 2020 Employed and working more hours than compared to March 2020 Employed but on paid leave (including furlough) Employed and on unpaid leave Apprenticeship In unpaid/voluntar…	COVID-19 questionnaire 4	Questionnaire 4 was collected between 17th November 2020 and 19th March 2021
Socio-demographics	Ethnicity	White	Due to few ethnicities other than White within ALSPAC , ethnicity was grouped into “White” and “Other than white”.	Internal ALSPAC data
Socio-demographics	Highest educational attainment	NVQ level 4 or higher	What educational qualifications do you have? Please tick all that apply: a) CSE or GCSE (D, E, F or G) b) O-level or GCSE (A, B or C) c) A-level d) Qualifications in shorthand/typing/or other skills, e g hairdressing e) Apprenticeship f) State enrolled nurse g) State registered nurse h) City & Guilds intermediate technical i) City & Guilds final technical j) City & Guilds full technical k) Teachi…	Internal ALSPAC data, collected during pregnancy 1990-1992
Socio-demographics	Rural-urban classification (RUC)	Rural
Socio-demographics	Sex	Female		Internal ALSPAC data
